# Supplementary material for: Cryptosporidium spp. Infections in Combination with Other Enteric Pathogens in the Global Calf Population
Source: MDPI journal article supplement (doi:10.3390/ani11061786), 2021-06-15

## SUPPLEMENTARY MATERIAL

**Table S1.** Subgroup meta-analysis of studies reporting the prevalence of *Cryptosporidium* spp. (Crypto).

| Crypto                                 |                              |             |                             |                                  |                              |                  |                      |
|----------------------------------------|------------------------------|-------------|-----------------------------|----------------------------------|------------------------------|------------------|----------------------|
|                                        | Sample Size<br>(No. Animals) | No. Studies | No.<br>Prevalence<br>Inputs | Weighted<br>Mean<br>Estimate (%) | Confidence<br>Interval (95%) | Qep <sup>9</sup> | I2 (%) <sup>10</sup> |
| Overall                                | 7191                         | 28          | 56                          | 27.57                            | (21.45-34.10)                | <0.01            | 96.70                |
| <b>Geographical region<sup>1</sup></b> |                              |             |                             |                                  |                              |                  |                      |
| Europe                                 | 4235                         | 16          | 26                          | 34.10                            | (25.27-43.48)                | <0.01            | 96.82                |
| North America                          | 240                          | 3           | 6                           | 25.58                            | (9.72-45.33)                 | <0.01            | 88.97                |
| South America                          | 452                          | 1           | 2                           | 29.44                            | (25.15-33.90)                | 0.85             | 0.00                 |
| Africa                                 | 328                          | 2           | 3                           | 9.38                             | (0.00-38.58)                 | <0.01            | 97.46                |
| East Asia                              | 251                          | 1           | 2                           | 19.23                            | (9.64-30.86)                 | 0.04             | 76.80                |
| South Asia                             | 193                          | 2           | 9                           | 14.61                            | (2.78-32.14)                 | <0.01            | 86.58                |
| West Asia                              | 266                          | 2           | 6                           | 44.57                            | (26.92-62.90)                | <0.01            | 87.88                |
| Oceania                                | 1226                         | 1           | 2                           | 8.98                             | (1.31-21.01)                 | <0.01            | 96.65                |
| <b>Period<sup>2</sup></b>              |                              |             |                             |                                  |                              |                  |                      |
| 1978-1980                              | 59                           | 1           | 2                           | 10.23                            | (0.24-28.57)                 | 0.08             | 68.03                |
| 1981-1990                              | 1465                         | 5           | 11                          | 20.22                            | (10.54-31.84)                | <0.01            | 94.86                |
| 1991-2000                              | 820                          | 6           | 12                          | 29.91                            | (15.78-46.13)                | <0.01            | 95.11                |
| 2001-2010                              | 1313                         | 8           | 13                          | 22.42                            | (9.71-38.14)                 | <0.01            | 96.91                |
| 2011-2019                              | 3534                         | 8           | 18                          | 36.15                            | (26.3-46.57)                 | <0.01            | 96.44                |
| <b>Herd type<sup>3</sup></b>           |                              |             |                             |                                  |                              |                  |                      |
| Dairy                                  | 3892                         | 16          | 29                          | 26.90                            | (17.17-37.80)                | <0.01            | 97.80                |
| Beef                                   | 304                          | 2           | 4                           | 29.25                            | (12.69-48.98)                | <0.01            | 86.17                |
| Mixed                                  | 895                          | 5           | 10                          | 17.13                            | (10.83-24.38)                | <0.01            | 79.87                |
| Not specified                          | 2100                         | 6           | 13                          | 38.08                            | (28.19-48.46)                | <0.01            | 91.78                |
| <b>Age class (in days)<sup>4</sup></b> |                              |             |                             |                                  |                              |                  |                      |
| 0-7                                    | 690                          | 8           | 9                           | 20.90                            | (8.70-36.22)                 | <0.01            | 91.42                |
| 7-14                                   | 1943                         | 12          | 15                          | 33.26                            | (18.91-49.27)                | <0.01            | 97.66                |
| 14-21                                  | 2637                         | 15          | 20                          | 27.76                            | (19.26-37.08)                | <0.01            | 95.33                |
| 21-28                                  | 1843                         | 7           | 8                           | 27.53                            | (10.55-48.39)                | <0.01            | 97.83                |
| 28-35                                  | 28                           | 2           | 2                           | 28.09                            | (3.06-63.61)                 | 0.06             | 71.07                |
| 35-42                                  | -                            | -           | -                           | -                                | -                            | -                | -                    |
| 42-49                                  | 50                           | 2           | 2                           | 13.84                            | (0.00-57.94)                 | <0.01            | 87.48                |
| <b>Health status<sup>5</sup></b>       |                              |             |                             |                                  |                              |                  |                      |
| Diarrhoea                              | 4269                         | 24          | 42                          | 31.51                            | (24.22-39.25)                | <0.01            | 95.54                |
| Normal                                 | 664                          | 9           | 9                           | 8.68                             | (5.87-11.89)                 | 0.14             | 25.45                |
| Mixed                                  | 1032                         | 3           | 3                           | 52.26                            | (27.09-76.88)                | <0.01            | 98.45                |
| Not specified                          | 1226                         | 1           | 2                           | 8.98                             | (1.31-21.01)                 | <0.01            | 96.65                |

| Sample type <sup>6</sup>                |      |    |    |       |               |       |       |
|-----------------------------------------|------|----|----|-------|---------------|-------|-------|
| Fecal                                   | 7111 | 26 | 51 | 27.49 | (21.13-34.29) | <0.01 | 96.96 |
| Both (Fecal+Autopsy)                    | 80   | 2  | 5  | 28.96 | (7.39-56.74)  | <0.01 | 81.50 |
| Diagnostic method (Crypto) <sup>7</sup> |      |    |    |       |               |       |       |
| ELISA                                   | 93   | 1  | 4  | <0.01 | (0.00-2.39)   | 0.97  | 0.00  |
| RA                                      | 1794 | 4  | 4  | 47.86 | (30.83-65.14) | <0.01 | 96.50 |
| Several                                 | 2957 | 11 | 24 | 39.41 | (30.93-48.21) | <0.01 | 94.55 |
| MS                                      | 2347 | 12 | 24 | 19.62 | (12.88-27.27) | <0.01 | 93.69 |
| Study type <sup>8</sup>                 |      |    |    |       |               |       |       |
| Case-control                            | 4109 | 13 | 26 | 23.12 | (16.05-30.97) | <0.01 | 96.32 |
| Case                                    | 3030 | 14 | 29 | 31.84 | (21.96-42.56) | <0.01 | 96.33 |
| Other                                   | 52   | 1  | 1  | 34.34 | (21.70-48.12) | 1.00  | 0.00  |

<sup>1</sup> Geographical region = Individual countries were assigned to Europe, Australia, West Asia, East Asia, South Asia, North America, South America and Africa.

<sup>2</sup> Period = Sample period described the begin and end of sampling in the studies. In case that the sampling period was not reported the publication data was used.

<sup>3</sup> Herd type = More than one herd types was assigned to the category “mixed” and the category “not specified” included studies, which not defined the herd type.

<sup>4</sup> Age class = If available in the studies, the median or mean of the animal age was used. If the median or mean of the animal age was not available, the center of the published age range was calculated and were clustered in 7-day periods.

<sup>5</sup> Health status = The health status cover animals with diarrhoea, normal (=without diarrhoea), mixed (=both diarrhoea and normal) and studies without information to the health status were assigned in the category “not specified”.

<sup>6</sup> Sample type = This category included fecal samples or fecal and autopsy samples.

<sup>7</sup> Diagnostic method = This category covered ELISA= Antigen enzyme-linked immunosorbent assay; RA= Lateral flow immunochromatographic assay; Several= covered more than one diagnostic methods for screening and confirmation of laboratory results; MS= Acid-fast staining.

<sup>8</sup> Study type = Case-control studies covered studies which tested diarrheic and normal calves and/or studies sampled animals in several regions of a country; Case studies incorporated studies which tested animals with diarrhoea and/or and/or studies sampled animals in several regions of a country.

<sup>9</sup> Qep = The Q statistic and its p-value serve as a test of significance.

<sup>10</sup> I<sup>2</sup> = The ratio of true heterogeneity to total variation in calculated effects, expressed in %.

**Table S2.** Subgroup meta-analysis of studies reporting the prevalence of *Cryptosporidium* spp. (Crypto) and Bovine rotavirus (BRV).

| Crypto-BRV                             |                              |             |                             |                                  |                              |                  |                      |
|----------------------------------------|------------------------------|-------------|-----------------------------|----------------------------------|------------------------------|------------------|----------------------|
|                                        | Sample Size<br>(No. Animals) | No. Studies | No.<br>Prevalence<br>Inputs | Weighted<br>Mean<br>Estimate (%) | Confidence<br>Interval (95%) | Qep <sup>9</sup> | I2 (%) <sup>10</sup> |
| Overall                                | 7191                         | 28          | 56                          | 6.69                             | (4.27-9.51)                  | <0.01            | 92.55                |
| <b>Geographical region<sup>1</sup></b> |                              |             |                             |                                  |                              |                  |                      |
| Europe                                 | 4235                         | 16          | 26                          | 8.90                             | (4.98-13.65)                 | <0.01            | 94.03                |
| North America                          | 240                          | 3           | 6                           | 6.59                             | (0.21-18.16)                 | <0.01            | 83.92                |
| South America                          | 452                          | 1           | 2                           | 5.68                             | (1.99-10.67)                 | 0.07             | 69.09                |
| East Asia                              | 251                          | 1           | 2                           | 0.79                             | (0.00-3.08)                  | 0.28             | 15.43                |
| West Asia                              | 266                          | 2           | 6                           | 16.61                            | (8.03-27.19)                 | 0.01             | 73.82                |
| South Asia                             | 193                          | 2           | 9                           | 1.98                             | (0.00-6.76)                  | 0.03             | 48.39                |
| Oceania                                | 1226                         | 1           | 2                           | 2.27                             | (0.91-4.05)                  | 0.14             | 52.98                |
| Africa                                 | 328                          | 2           | 3                           | 0.62                             | (0.00-8.81)                  | <0.01            | 91.29                |
| <b>Period<sup>2</sup></b>              |                              |             |                             |                                  |                              |                  |                      |
| 1978-1980                              | 59                           | 1           | 2                           | 2.04                             | (0.00-11.65)                 | 0.16             | 49.67                |
| 1981-1990                              | 1465                         | 5           | 11                          | 3.92                             | (0.10-10.93)                 | <0.01            | 94.44                |
| 1991-2000                              | 820                          | 6           | 12                          | 8.46                             | (2.66-16.47)                 | <0.01            | 89.89                |
| 2001-2010                              | 1313                         | 8           | 13                          | 5.62                             | (1.79-10.88)                 | <0.01            | 88.07                |
| 2011-2019                              | 3534                         | 8           | 18                          | 9.07                             | (4.72-14.44)                 | <0.01            | 93.35                |
| <b>Herd type<sup>3</sup></b>           |                              |             |                             |                                  |                              |                  |                      |
| Dairy                                  | 3892                         | 16          | 29                          | 6.13                             | (2.90-10.19)                 | <0.01            | 93.46                |
| Beef                                   | 304                          | 2           | 4                           | 5.64                             | (0.03-16.64)                 | 0.01             | 80.25                |
| Mixed                                  | 895                          | 5           | 10                          | 3.23                             | (0.61-7.17)                  | <0.01            | 75.81                |
| Not specified                          | 2100                         | 6           | 13                          | 12.37                            | (6.04-20.24)                 | <0.01            | 91.71                |
| <b>Age class (in days)<sup>4</sup></b> |                              |             |                             |                                  |                              |                  |                      |
| 0-7                                    | 690                          | 8           | 9                           | 9.04                             | (2.72-17.87)                 | <0.01            | 83.75                |
| 7-14                                   | 1943                         | 12          | 15                          | 9.27                             | (3.42-17.10)                 | <0.01            | 94.83                |
| 14-21                                  | 2637                         | 15          | 20                          | 5.84                             | (2.41-10.29)                 | <0.01            | 92.00                |
| 21-28                                  | 1843                         | 7           | 8                           | 3.28                             | (0.16-8.74)                  | <0.01            | 90.48                |
| 28-35                                  | 28                           | 2           | 2                           | 6.41                             | (0.00-21.29)                 | 0.26             | 20.31                |
| 35-42                                  | -                            | -           | -                           | -                                | -                            | -                | -                    |
| 42-49                                  | 50                           | 2           | 2                           | 7.80                             | (0.00-27.97)                 | 0.11             | 60.99                |
| <b>Health status<sup>5</sup></b>       |                              |             |                             |                                  |                              |                  |                      |
| Diarrhoea                              | 4269                         | 24          | 42                          | 9.43                             | (6.28-13.06)                 | <0.01            | 89.62                |
| Normal                                 | 664                          | 9           | 9                           | 0.00                             | (0.00-0.03)                  | 0.60             | 0.00                 |
| Mixed                                  | 1032                         | 3           | 3                           | 8.78                             | (2.19-18.29)                 | <0.01            | 94.30                |
| Not specified                          | 1226                         | 1           | 2                           | 2.27                             | (0.91-4.05)                  | 0.14             | 52.98                |
| <b>Sample type<sup>6</sup></b>         |                              |             |                             |                                  |                              |                  |                      |
| Fecal                                  | 7111                         | 26          | 51                          | 6.50                             | (4.09-9.32)                  | <0.01            | 92.72                |

|                                               |      |    |    |       |              |       |       |
|-----------------------------------------------|------|----|----|-------|--------------|-------|-------|
| Both (Fecal+Autopsy)                          | 80   | 2  | 5  | 10.96 | (0.04-32.23) | 0.00  | 77.94 |
| <b>Diagnostic method (Crypto)<sup>7</sup></b> |      |    |    |       |              |       |       |
| ELISA                                         | 93   | 1  | 4  | <0.01 | (0.00-2.39)  | 0.97  | 0.00  |
| RA                                            | 1794 | 4  | 4  | 13.49 | (6.80-21.74) | <0.01 | 89.72 |
| Several                                       | 2957 | 11 | 24 | 12.21 | (7.27-15.75) | <0.01 | 89.01 |
| MS                                            | 2347 | 12 | 24 | 3.44  | (0.85-7.16)  | <0.01 | 91.00 |
| <b>Diagnostic method (BRV)<sup>7</sup></b>    |      |    |    |       |              |       |       |
| ELISA                                         | 1086 | 7  | 16 | 2.21  | (0.06-6.16)  | <0.01 | 84.92 |
| RA                                            | 2412 | 6  | 10 | 14.94 | (9.76-20.89) | <0.01 | 87.27 |
| Several                                       | 3672 | 14 | 27 | 6.33  | (3.40-9.91)  | <0.01 | 91.30 |
| Other im                                      | 21   | 1  | 3  | 23.33 | (0.97-59.14) | 0.05  | 65.92 |
| <b>Study type<sup>8</sup></b>                 |      |    |    |       |              |       |       |
| Case-control                                  | 4109 | 13 | 26 | 4.27  | (1.89-7.30)  | <0.01 | 91.55 |
| Case                                          | 3030 | 14 | 29 | 9.29  | (5.13-14.34) | <0.01 | 91.39 |
| Other                                         | 52   | 1  | 1  | 12.82 | (4.59-23.81) | 1.00  | 0.00  |

<sup>1</sup> Geographical region = Individual countries were assigned to Europe, Australia, West Asia, East Asia, South Asia, North America, South America and Africa.

<sup>2</sup> Period = Sample period described the begin and end of sampling in the studies. In case that the sampling period was not reported the publication data was used.

<sup>3</sup> Herd type = More than one herd types was assigned to the category “mixed” and the category “not specified” included studies, which not defined the herd type.

<sup>4</sup> Age class = If available in the studies, the median or mean of the animal age was used. If the median or mean of the animal age was not available, the center of the published age range was calculated and were clustered in 7-day periods.

<sup>5</sup> Health status = The health status cover animals with diarrhoea, normal (=without diarrhoea), mixed (=both diarrhoea and normal) and studies without information to the health status were assigned in the category “not specified”.

<sup>6</sup> Sample type = This category included fecal samples or fecal and autopsy samples.

<sup>7</sup> Diagnostic method = This category covered ELISA= Antigen enzyme-linked immunosorbent assay; RA= Lateral flow immunochromatographic assay; Several= covered more than one diagnostic methods for screening and confirmation of laboratory results; MS= Acid-fast staining; Other im = Other antibody-based methods besides ELISA and RA (i.e., Immunohistochemical / immunostaining, Fluorescence antibody technique).

<sup>8</sup> Study type = Case-control studies covered studies which tested diarrheic and normal calves and/or studies sampled animals in several regions of a country; Case studies incorporated studies which tested animals with diarrhoea and/or and/or studies sampled animals in several regions of a country.

<sup>9</sup> Qep = The Q statistic and its p-value serve as a test of significance.

<sup>10</sup> I<sup>2</sup> = The ratio of true heterogeneity to total variation in calculated effects, expressed in %.

**Table S3.** Subgroup meta-analysis of studies reporting the prevalence of *Cryptosporidium* spp. (Crypto) and Bovine Coronavirus (BCoV).

| Crypto-BCoV                            |                              |             |                             |                                  |                              |                  |                                  |
|----------------------------------------|------------------------------|-------------|-----------------------------|----------------------------------|------------------------------|------------------|----------------------------------|
|                                        | Sample Size<br>(No. Animals) | No. Studies | No.<br>Prevalence<br>Inputs | Weighted<br>Mean<br>Estimate (%) | Confidence<br>Interval (95%) | Qep <sup>9</sup> | I <sup>2</sup> (%) <sup>10</sup> |
| Overall                                | 5973                         | 24          | 49                          | 1.45                             | (0.44-2.83)                  | <0.01            | 84.71                            |
| <b>Geographical region<sup>1</sup></b> |                              |             |                             |                                  |                              |                  |                                  |
| Europe                                 | 3469                         | 13          | 21                          | 1.79                             | (0.07-4.88)                  | <0.01            | 92.88                            |
| North America                          | 240                          | 3           | 6                           | 6.75                             | (2.43-12.54)                 | 0.10             | 44.51                            |
| South America                          | -                            | -           | -                           | -                                | -                            | -                | -                                |
| Africa                                 | 328                          | 2           | 3                           | 0.51                             | (0.00-4.92)                  | <0.01            | 79.03                            |
| East Asia                              | 251                          | 1           | 2                           | 0.00                             | (0.00-0.02)                  | 0.95             | 0.00                             |
| South Asia                             | 193                          | 2           | 9                           | 0.93                             | (0.00-3.55)                  | 0.40             | 4.50                             |
| West Asia                              | 266                          | 2           | 6                           | 1.74                             | (0.04-4.87)                  | 0.17             | 29.86                            |
| Oceania                                | 1226                         | 1           | 2                           | 0.00                             | (0.00-0.12)                  | 0.99             | 0.00                             |
| <b>Period<sup>2</sup></b>              |                              |             |                             |                                  |                              |                  |                                  |
| 1978-1980                              | 59                           | 1           | 2                           | 1.94                             | (0.00-11.55)                 | 0.16             | 49.67                            |
| 1981-1990                              | 734                          | 3           | 7                           | 4.34                             | (0.00-19.13)                 | <0.01            | 95.97                            |
| 1991-2000                              | 757                          | 5           | 10                          | 1.59                             | (0.07-4.29)                  | <0.01            | 66.13                            |
| 2001-2010                              | 889                          | 7           | 12                          | 0.65                             | (0.00-2.65)                  | <0.01            | 65.41                            |
| 2011-2019                              | 3534                         | 8           | 18                          | 1.97                             | (0.32-4.49)                  | <0.01            | 87.72                            |
| <b>Herd type<sup>3</sup></b>           |                              |             |                             |                                  |                              |                  |                                  |
| Dairy                                  | 2950                         | 13          | 25                          | 1.92                             | (0.48-3.97)                  | <0.01            | 82.16                            |
| Beef                                   | 91                           | 1           | 3                           | 7.99                             | (2.79-15.01)                 | 0.53             | 0.00                             |
| Mixed                                  | 832                          | 4           | 8                           | 0.00                             | (0.00-0.15)                  | 0.61             | 0.00                             |
| Not specified                          | 2100                         | 6           | 13                          | 1.99                             | (0.00-7.09)                  | <0.01            | 92.83                            |
| <b>Age class (in days)<sup>4</sup></b> |                              |             |                             |                                  |                              |                  |                                  |
| 0-7                                    | 690                          | 8           | 9                           | 2.01                             | (0.06-5.60)                  | <0.01            | 60.29                            |
| 7-14                                   | 1240                         | 10          | 12                          | 2.99                             | (0.03-8.65)                  | <0.01            | 91.19                            |
| 14-21                                  | 2122                         | 13          | 16                          | 0.90                             | (0.00-3.32)                  | <0.01            | 86.89                            |
| 21-28                                  | 1843                         | 7           | 8                           | 0.91                             | (<0.01-2.75)                 | 0.02             | 61.34                            |
| 28-35                                  | 28                           | 2           | 2                           | 0.28                             | (0.00-7.81)                  | 0.85             | 0.00                             |
| 35-42                                  | -                            | -           | -                           | -                                | -                            | -                | -                                |
| 42-49                                  | 50                           | 2           | 2                           | 0.00                             | (0.00-3.62)                  | 0.69             | 0.00                             |
| <b>Health status<sup>5</sup></b>       |                              |             |                             |                                  |                              |                  |                                  |
| Diarrhoea                              | 3764                         | 21          | 38                          | 1.80                             | (0.57-3.48)                  | <0.01            | 79.75                            |
| Normal                                 | 375                          | 7           | 7                           | 0.00                             | (0.00-0.34)                  | 0.96             | 0.00                             |
| Mixed                                  | 608                          | 2           | 2                           | 8.54                             | (0.00-36.87)                 | <0.01            | 98.39                            |
| Not specified                          | 1226                         | 1           | 2                           | 0.00                             | (0.00-0.12)                  | 0.99             | 0.00                             |
| <b>Sample type<sup>6</sup></b>         |                              |             |                             |                                  |                              |                  |                                  |
| Fecal                                  | 5893                         | 22          | 44                          | 1.09                             | (0.29-2.21)                  | <0.01            | 80.54                            |

|                                               |      |    |    |       |              |       |       |
|-----------------------------------------------|------|----|----|-------|--------------|-------|-------|
| Both (Fecal+Autopsy)                          | 80   | 2  | 5  | 13.09 | (0.29-36.21) | <0.01 | 79.51 |
| <b>Diagnostic method (Crypto)<sup>7</sup></b> |      |    |    |       |              |       |       |
| ELISA                                         | 93   | 1  | 4  | 0.00  | (0.00-2.30)  | 0.97  | 0.00  |
| RA                                            | 1370 | 3  | 3  | 1.17  | (0.00-7.01)  | 0.01  | 77.05 |
| Several                                       | 2957 | 11 | 24 | 1.61  | (0.38-3.39)  | <0.01 | 78.38 |
| MS                                            | 1553 | 9  | 18 | 2.21  | (0.04-6.30)  | <0.01 | 90.33 |
| <b>Diagnostic method (BCoV)<sup>7</sup></b>   |      |    |    |       |              |       |       |
| ELISA                                         | 2259 | 8  | 16 | 0.83  | (0.02-2.41)  | <0.01 | 74.79 |
| RA                                            | 1988 | 5  | 9  | 2.48  | (0.03-7.13)  | <0.01 | 89.60 |
| Several                                       | 1363 | 8  | 16 | 0.48  | (0.00-1.65)  | 0.02  | 45.45 |
| EM                                            | 91   | 1  | 3  | 7.99  | (2.79-15.01) | 0.53  | 0.00  |
| Other im                                      | 21   | 1  | 3  | 28.88 | (4.41-62.22) | 0.11  | 59.19 |
| PCR                                           | 251  | 1  | 2  | 0.00  | (0.00-0.02)  | 0.95  | 0.00  |
| <b>Study type<sup>8</sup></b>                 |      |    |    |       |              |       |       |
| Case-control                                  | 3343 | 10 | 21 | 0.48  | (0.00-1.88)  | <0.01 | 84.64 |
| Case                                          | 2578 | 13 | 27 | 2.83  | (0.88-5.52)  | <0.01 | 81.02 |
| Other                                         | 52   | 1  | 1  | 1.17  | (0.00-7.26)  | 1.00  | 0.00  |

<sup>1</sup> Geographical region = Individual countries were assigned to Europe, Australia, West Asia, East Asia, South Asia, North America, South America and Africa.

<sup>2</sup> Period = Sample period described the begin and end of sampling in the studies. In case that the sampling period was not reported the publication data was used.

<sup>3</sup> Herd type = More than one herd types was assigned to the category “mixed” and the category “not specified” included studies, which not defined the herd type.

<sup>4</sup> Age class = If available in the studies, the median or mean of the animal age was used. If the median or mean of the animal age was not available, the center of the published age range was calculated and were clustered in 7-day periods.

<sup>5</sup> Health status = The health status cover animals with diarrhoea, normal (=without diarrhoea), mixed (=both diarrhoea and normal) and studies without information to the health status were assigned in the category “not specified”.

<sup>6</sup> Sample type = This category included fecal samples or fecal and autopsy samples.

<sup>7</sup> Diagnostic method = This category covered ELISA= Antigen enzyme-linked immunosorbent assay; RA= Lateral flow immunochromatographic assay; Several= covered more than one diagnostic methods for screening and confirmation of laboratory results; MS= Acid-fast staining; EM= Electron microscopy; Other im = Other antibody-based methods besides ELISA and RA (i.e., Immunohistochemical / immunostaining, Fluorescence antibody technique); PCR=Polymerase chain reaction.

<sup>8</sup> Study type = Case-control studies covered studies which tested diarrheic and normal calves and/or studies sampled animals in several regions of a country; Case studies incorporated studies which tested animals with diarrhoea and/or and/or studies sampled animals in several regions of a country.

<sup>9</sup> Qep = The Q statistic and its p-value serve as a test of significance.

<sup>10</sup> I<sup>2</sup> = The ratio of true heterogeneity to total variation in calculated effects, expressed in %.

**Table S4.** Subgroup meta-analysis of studies reporting the prevalence of *Cryptosporidium* spp. (Crypto) and *Escherichia coli* F5 (K99) (ETEC).

| Crypto-ETEC                            |                              |             |                             |                                  |                              |                  |                      |
|----------------------------------------|------------------------------|-------------|-----------------------------|----------------------------------|------------------------------|------------------|----------------------|
|                                        | Sample Size<br>(No. Animals) | No. Studies | No.<br>Prevalence<br>Inputs | Weighted<br>Mean<br>Estimate (%) | Confidence<br>Interval (95%) | Qep <sup>9</sup> | I2 (%) <sup>10</sup> |
| Overall                                | 5719                         | 26          | 52                          | 0.28                             | (0.00-0.88)                  | <0.01            | 67.39                |
| <b>Geographical region<sup>1</sup></b> |                              |             |                             |                                  |                              |                  |                      |
| Europe                                 | 3811                         | 15          | 25                          | 0.09                             | (0.00-0.75)                  | <0.01            | 69.04                |
| North America                          | 240                          | 3           | 6                           | 0.56                             | (0.00-2.73)                  | 0.30             | 10.08                |
| South America                          | 452                          | 1           | 2                           | 0.00                             | (0.00-0.00)                  | 0.97             | 0.00                 |
| Africa                                 | 328                          | 2           | 3                           | 0.12                             | (0.00-4.55)                  | <0.01            | 83.63                |
| East Asia                              | -                            | -           | -                           | -                                | -                            | -                | -                    |
| South Asia                             | 193                          | 2           | 9                           | 0.61                             | (0.00-2.90)                  | 0.71             | 0.00                 |
| West Asia                              | 266                          | 2           | 6                           | 4.71                             | (0.69-10.99)                 | <0.01            | 65.16                |
| Oceania                                | 429                          | 1           | 1                           | 0.00                             | (0.00-0.19)                  | 1.00             | 0.00                 |
| <b>Period<sup>2</sup></b>              |                              |             |                             |                                  |                              |                  |                      |
| 1978-1980                              | 59                           | 1           | 2                           | 0.00                             | (0.00-3.01)                  | 0.95             | 0.00                 |
| 1981-1990                              | 1465                         | 5           | 11                          | 0.00                             | (0.00-0.00)                  | 0.62             | 0.00                 |
| 1991-2000                              | 820                          | 6           | 12                          | 0.71                             | (0.00-2.79)                  | <0.01            | 65.00                |
| 2001-2010                              | 638                          | 6           | 10                          | 0.11                             | (0.00-1.07)                  | 0.16             | 18.22                |
| 2011-2019                              | 2737                         | 8           | 17                          | 1.38                             | (0.10-3.54)                  | <0.01            | 80.78                |
| <b>Herd type<sup>3</sup></b>           |                              |             |                             |                                  |                              |                  |                      |
| Dairy                                  | 2671                         | 15          | 27                          | 0.38                             | (0.00-1.28)                  | <0.01            | 62.22                |
| Beef                                   | 304                          | 2           | 4                           | 0.00                             | (0.00-0.02)                  | 0.82             | 0.00                 |
| Mixed                                  | 895                          | 5           | 10                          | 0.00                             | (0.00-0.00)                  | 0.80             | 0.00                 |
| Not specified                          | 1849                         | 5           | 11                          | 2.30                             | (0.16-5.92)                  | <0.01            | 78.88                |
| <b>Age class (in days)<sup>4</sup></b> |                              |             |                             |                                  |                              |                  |                      |
| 0-7                                    | 690                          | 8           | 9                           | 0.37                             | (0.00-1.88)                  | 0.11             | 24.10                |
| 7-14                                   | 1519                         | 11          | 14                          | 0.21                             | (0.00-1.13)                  | 0.02             | 45.37                |
| 14-21                                  | 1589                         | 13          | 17                          | 0.04                             | (0.00-0.93)                  | <0.01            | 67.00                |
| 21-28                                  | 1843                         | 7           | 8                           | 0.30                             | (0.00-3.16)                  | <0.01            | 87.42                |
| 28-35                                  | 28                           | 2           | 2                           | 6.31                             | (0.00-21.22)                 | 0.26             | 20.31                |
| 35-42                                  | -                            | -           | -                           | -                                | -                            | -                | -                    |
| 42-49                                  | 50                           | 2           | 2                           | 5.24                             | (0.26-13.97)                 | 0.36             | 0.00                 |
| <b>Health status<sup>5</sup></b>       |                              |             |                             |                                  |                              |                  |                      |
| Diarrhoea                              | 4132                         | 23          | 41                          | 0.62                             | (0.06-1.57)                  | <0.01            | 69.59                |
| Normal                                 | 550                          | 8           | 8                           | 0.00                             | (0.00-0.39)                  | 0.97             | 0.00                 |
| Mixed                                  | 608                          | 2           | 2                           | 0.00                             | (0.00-0.52)                  | 0.11             | 59.94                |
| Not specified                          | 429                          | 1           | 1                           | 0.00                             | (0.00-0.19)                  | 1.00             | 0.00                 |
| <b>Sample type<sup>6</sup></b>         |                              |             |                             |                                  |                              |                  |                      |
| Fecal                                  | 5639                         | 24          | 47                          | 0.30                             | (0.00-0.97)                  | <0.01            | 72.50                |
| Both (Fecal+Autopsy)                   | 80                           | 2           | 5                           | 0.09                             | (0.00-3.25)                  | 0.97             | 0.00                 |

| <b>Diagnostic method (Crypto)<sup>7</sup></b> |      |    |    |      |             |       |       |
|-----------------------------------------------|------|----|----|------|-------------|-------|-------|
| ELISA                                         | 93   | 1  | 4  | 0.00 | (0.00-1.48) | 0.97  | 0.00  |
| RA                                            | 1370 | 3  | 3  | 0.00 | (0.00-2.31) | 0.15  | 57.92 |
| Several                                       | 2160 | 11 | 23 | 1.58 | (0.35-3.38) | <0.01 | 72.96 |
| MS                                            | 2096 | 11 | 22 | 0.00 | (0.00-0.08) | 0.01  | 35.34 |
| <b>Diagnostic method (ETEC)<sup>7</sup></b>   |      |    |    |      |             |       |       |
| ELISA                                         | 183  | 2  | 5  | 1.25 | (0.00-4.20) | 0.36  | 4.42  |
| RA                                            | 1988 | 5  | 9  | 2.22 | (0.04-6.29) | <0.01 | 87.25 |
| Several                                       | 1426 | 10 | 21 | 0.87 | (0.08-2.21) | <0.01 | 44.39 |
| Agglutination                                 | 2122 | 9  | 17 | 0.00 | (0.00-0.00) | 0.06  | 33.17 |
| <b>Study type<sup>8</sup></b>                 |      |    |    |      |             |       |       |
| Case-control                                  | 2637 | 11 | 22 | 0.28 | (0.00-1.39) | <0.01 | 75.93 |
| Case                                          | 3030 | 14 | 29 | 0.32 | (0.00-1.20) | <0.01 | 58.80 |
| Other                                         | 52   | 1  | 1  | 0.00 | (0.00-2.48) | 1.00  | 0.00  |

<sup>1</sup> Geographical region = Individual countries were assigned to Europe, Australia, West Asia, East Asia, South Asia, North America, South America and Africa.

<sup>2</sup> Period = Sample period described the begin and end of sampling in the studies. In case that the sampling period was not reported the publication data was used.

<sup>3</sup> Herd type = More than one herd types was assigned to the category “mixed” and the category “not specified” included studies, which not defined the herd type.

<sup>4</sup> Age class = If available in the studies, the median or mean of the animal age was used. If the median or mean of the animal age was not available, the center of the published age range was calculated and were clustered in 7-day periods.

<sup>5</sup> Health status = The health status cover animals with diarrhoea, normal (=without diarrhoea), mixed (=both diarrhoea and normal) and studies without information to the health status were assigned in the category “not specified”.

<sup>6</sup> Sample type = This category included fecal samples or fecal and autopsy samples.

<sup>7</sup> Diagnostic method = This category covered ELISA= Antigen enzyme-linked immunosorbent assay; RA= Lateral flow immunochromatographic assay; Several= covered more than one diagnostic methods for screening and confirmation of laboratory results; MS= Acid-fast staining; Agglutination = Bacterial culture followed by slide agglutination or latex agglutination.

<sup>8</sup> Study type = Case-control studies covered studies which tested diarrheic and normal calves and/or studies sampled animals in several regions of a country; Case studies incorporated studies which tested animals with diarrhoea and/or and/or studies sampled animals in several regions of a country.

<sup>9</sup> Qep = The Q statistic and its p-value serve as a test of significance.

<sup>10</sup> I<sup>2</sup> = The ratio of true heterogeneity to total variation in calculated effects, expressed in %.



**Table S5.** Estimated mean prevalence (%) of the pathogens in the various countries, shown in Figure 1.

| <b>Country</b> | <b>Crypto</b> | <b>BRV</b> | <b>BCoV</b> | <b>ETEC</b> | <b>Crypto-BRV</b> | <b>Crypto-BCoV</b> | <b>Crypto-ETEC</b> |
|----------------|---------------|------------|-------------|-------------|-------------------|--------------------|--------------------|
| Germany        | 48,67         | 39,45      | 19,02       | 4,24        | 16,28             | 4,29               | 0,00               |
| Ireland        | 44,29         | 38,63      | 9,12        | 14,08       | 16,70             | 3,39               | 3,39               |
| Italy          | 57,16         | 32,18      | 3,56        | 3,75        | 10,63             | 0,00               | 3,39               |
| Netherlands    | 27,06         | 16,72      | 1,73        | 1,45        | 6,38              | NA                 | NA                 |
| Spain          | 43,18         | 41,67      | 24,60       | 10,07       | 15,39             | 0,96               | 2,96               |
| Sweden         | 20,89         | 15,09      | 1,84        | 2,71        | 1,17              | 0,76               | 0,00               |
| Switzerland    | 42,71         | 36,57      | 3,61        | 4,61        | 15,57             | 1,32               | 0,50               |
| Turkey         | 44,57         | 32,17      | 4,27        | 18,01       | 16,61             | 1,74               | 4,71               |
| United Kingdom | 23,75         | 36,35      | 14,88       | 2,07        | 6,52              | 4,34               | 0,00               |

**Figure S1.** Studies incorporated in the presented study.

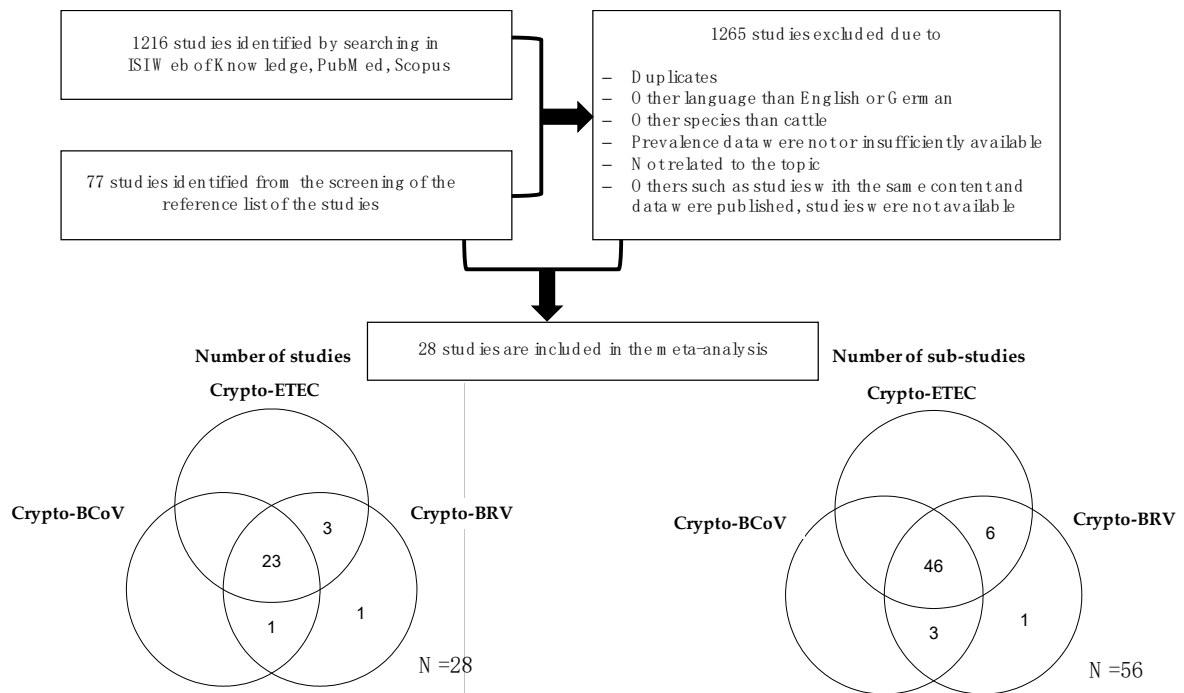

**Figure S2.** Forest plot of prevalence with *Cryptosporidium* spp. (Crypto) ordered by health status and publication year of the studies.

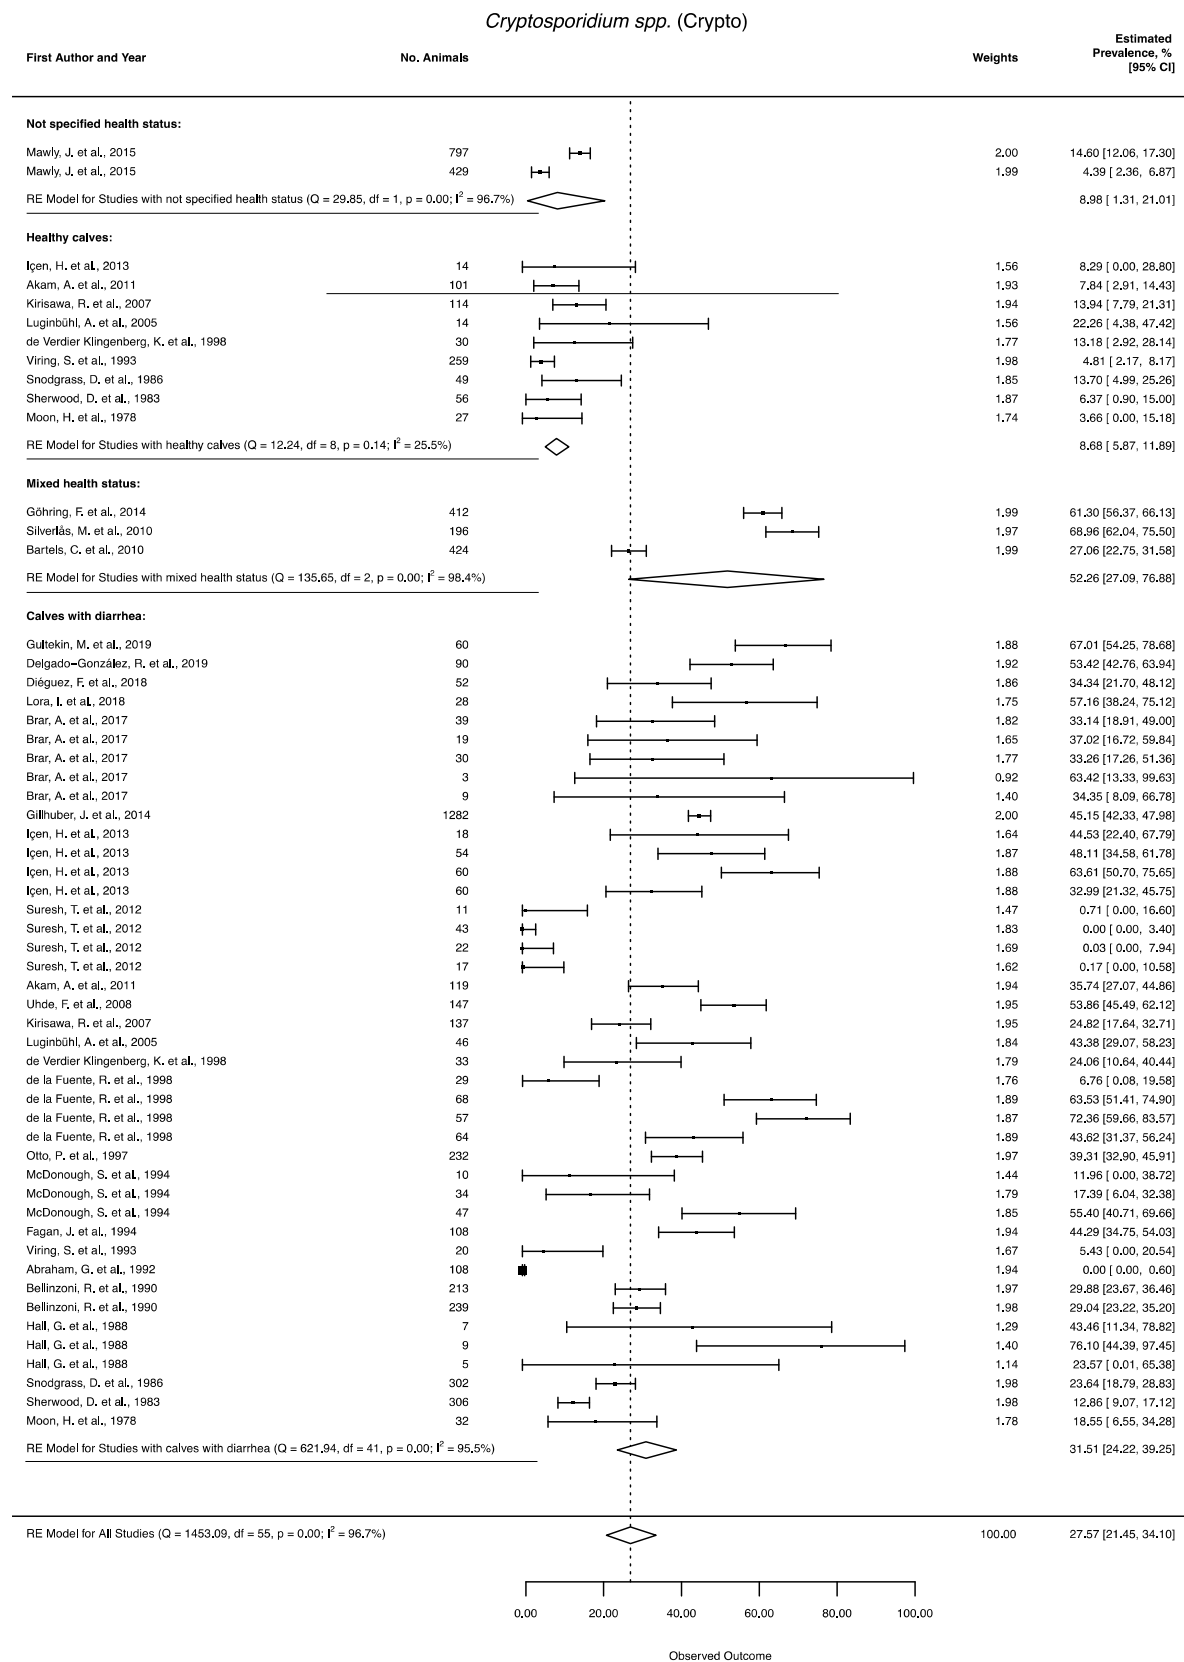

**Figure S3.** Forest plot of prevalence with *Cryptosporidium* spp. (Crypto) and bovine rotavirus (BRV) ordered by health status and publication year of the studies.

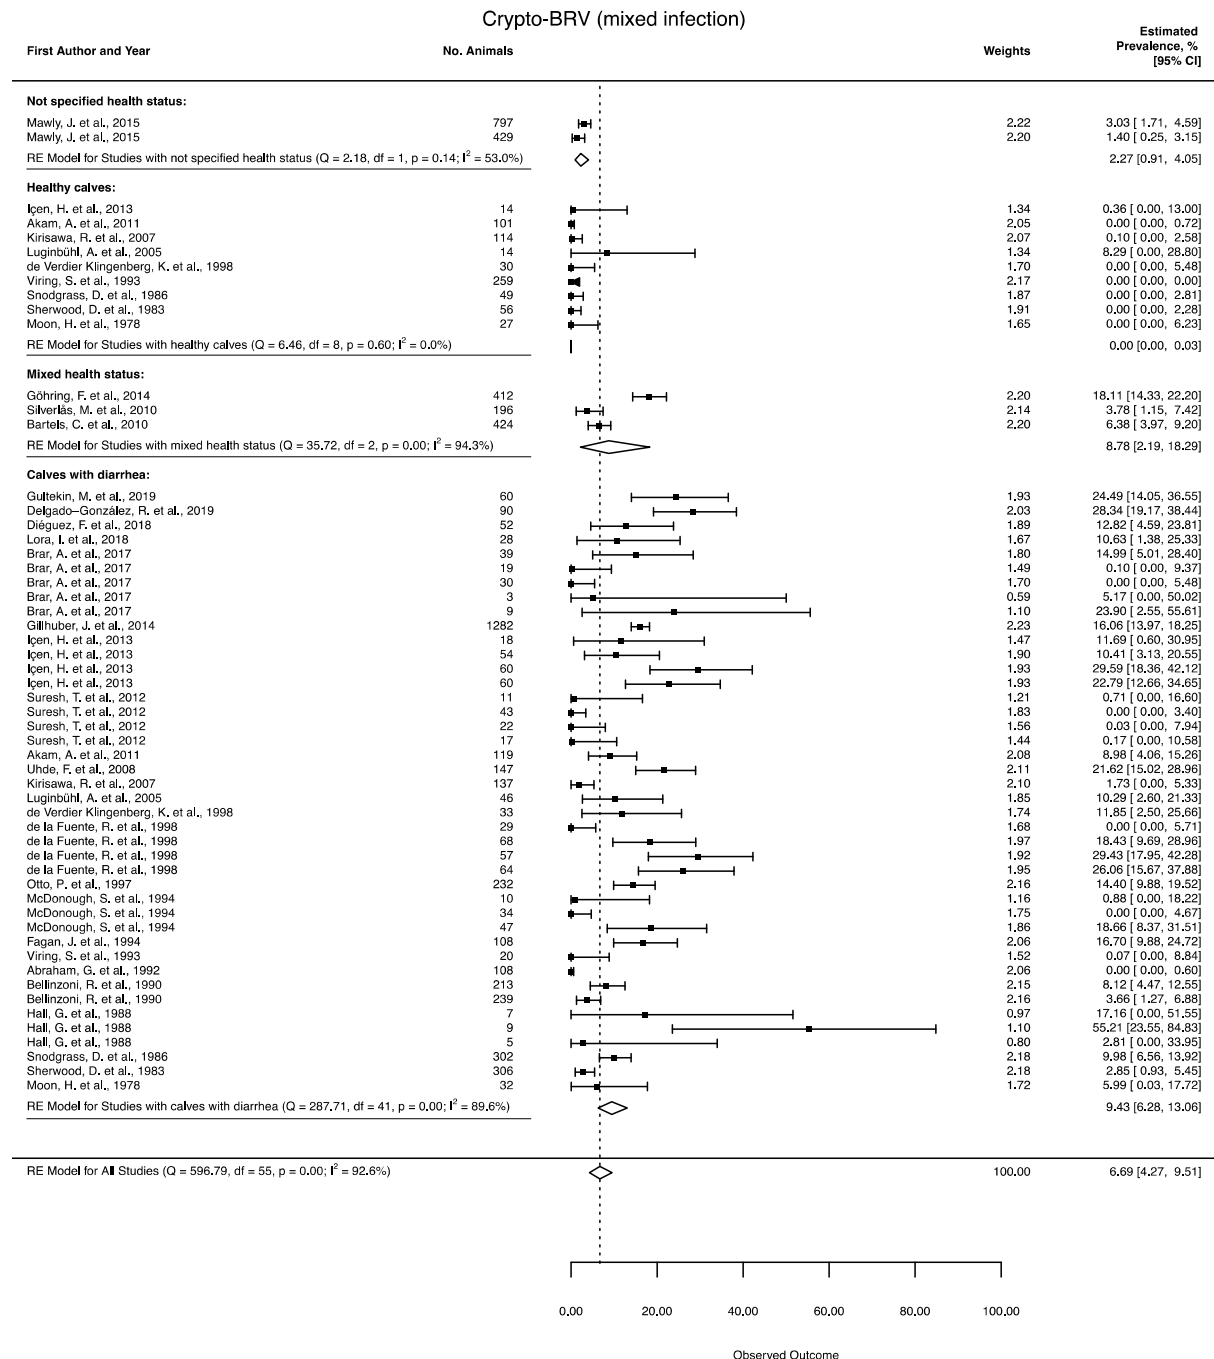

**Figure S4.** Forest plot of prevalence with *Cryptosporidium* spp. (Crypto) and bovine coronavirus (BCoV) ordered by health status and publication year of the studies.

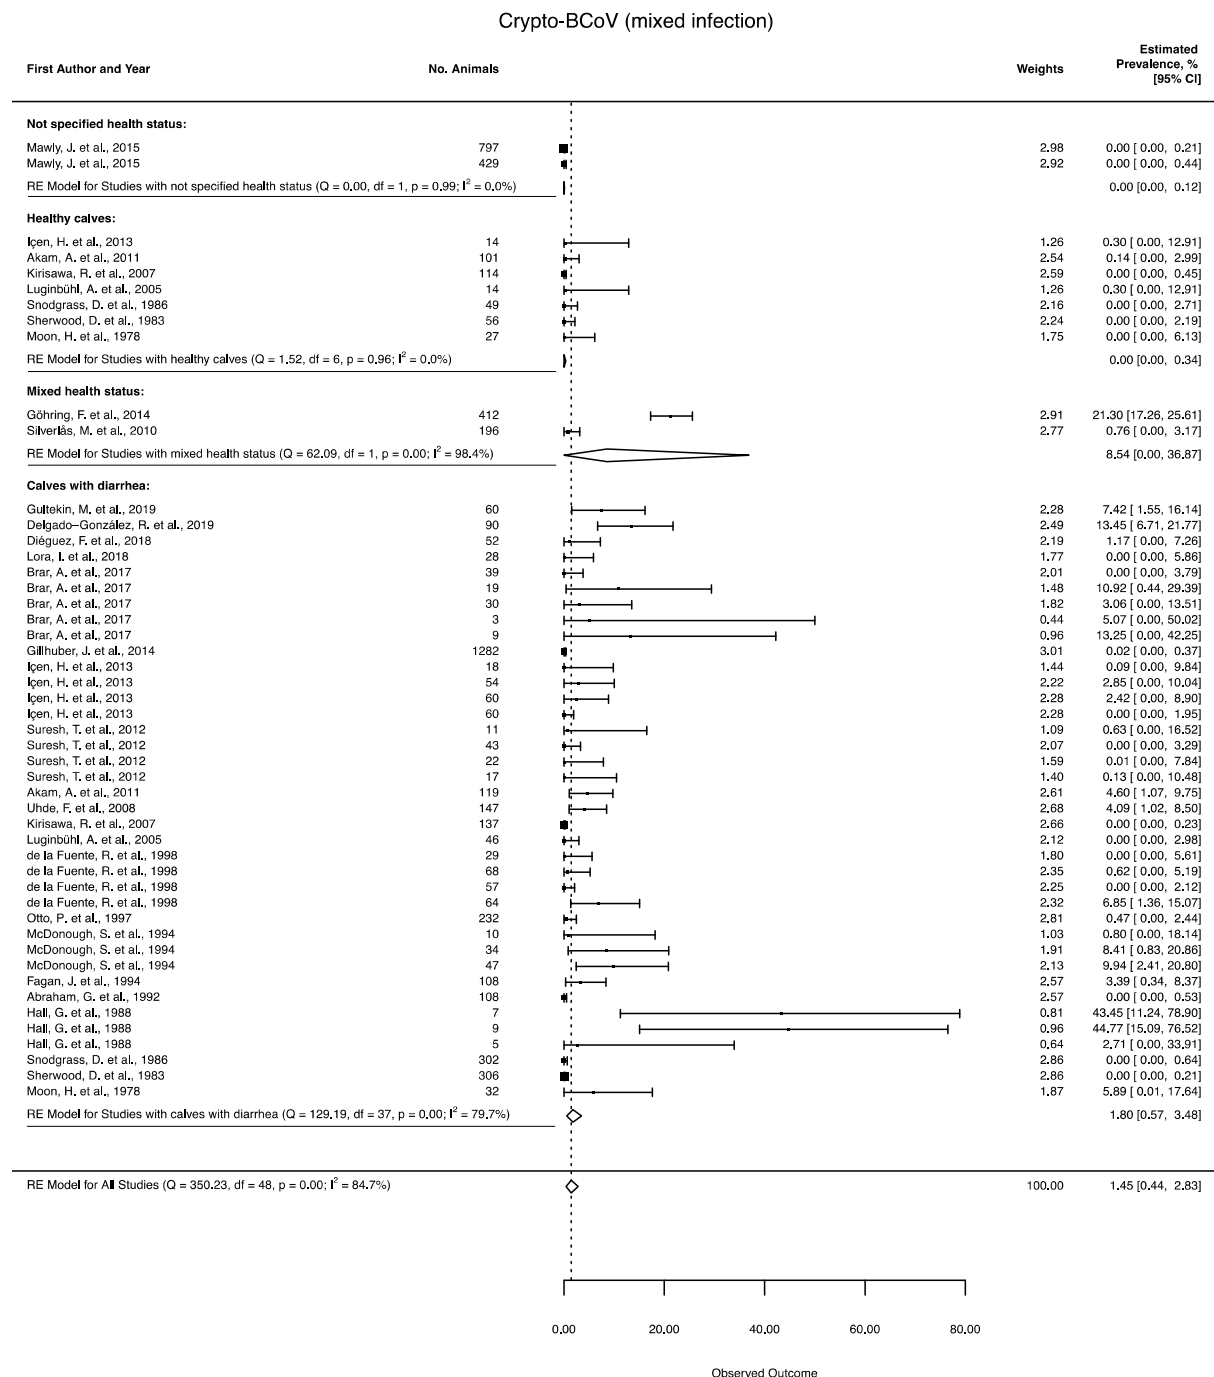

**Figure S5.** Forest plot of prevalence with *Cryptosporidium* spp. (Crypto) and *Escherichia coli* F5 (K99) (ETEC) ordered by health status and publication year of the studies.

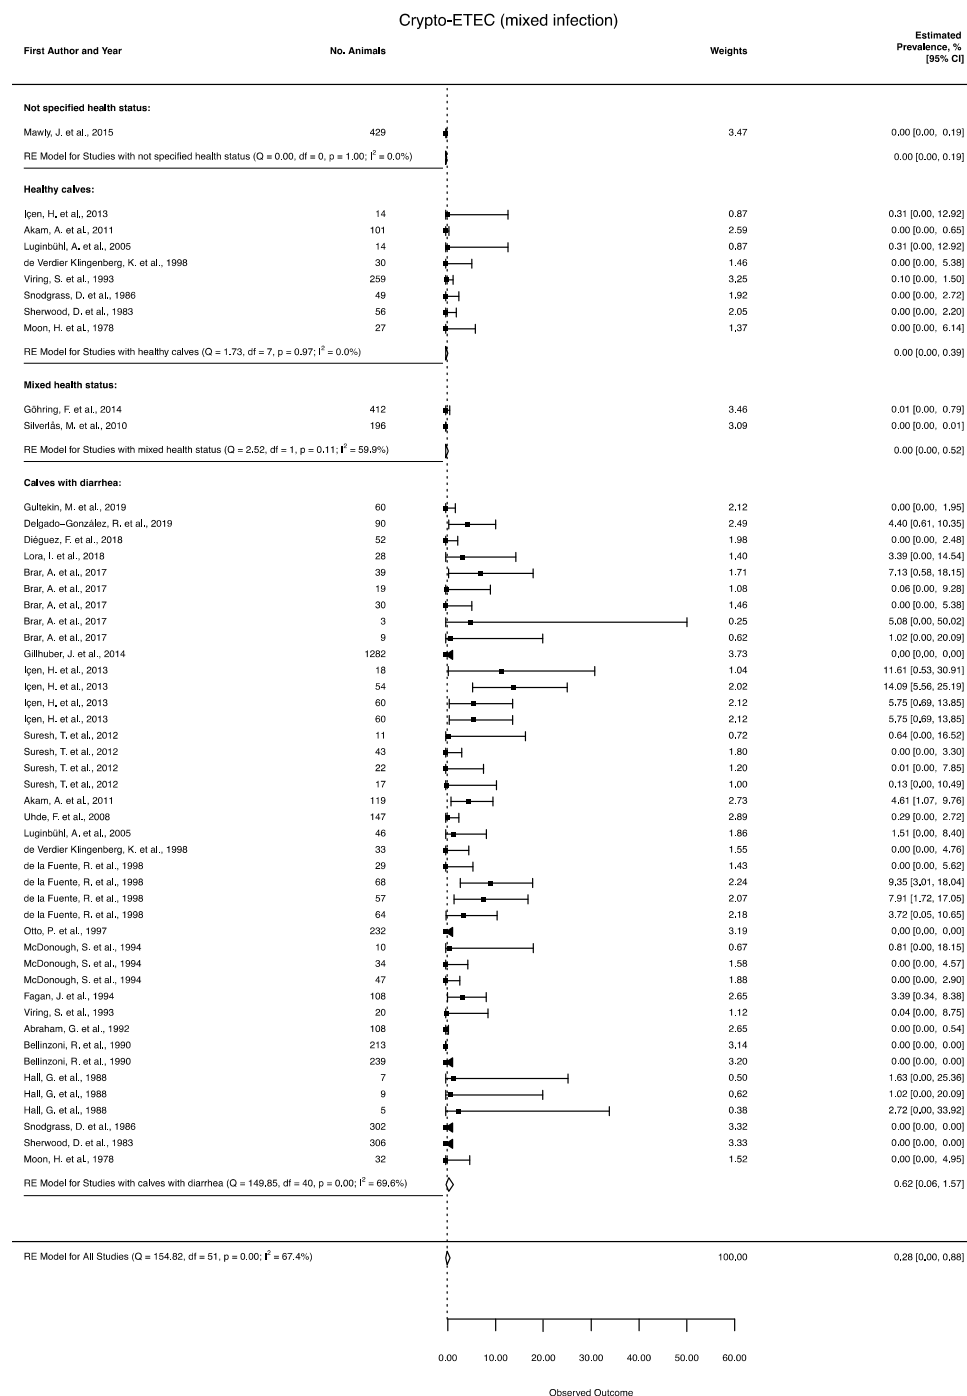

**Figure S6.** Case influence diagnostic analysis (a) and funnel plot (b) of *Cryptosporidium* spp. (Crypto) and the identified outliers (shown as red circles). N.B. In case of Crypto-BRV no outliers were identified. The regression test for funnel plot asymmetry in the meta-analysis indicated no publication bias for Crypto ( $z = -0.33$ ;  $p = 0.73$ ).

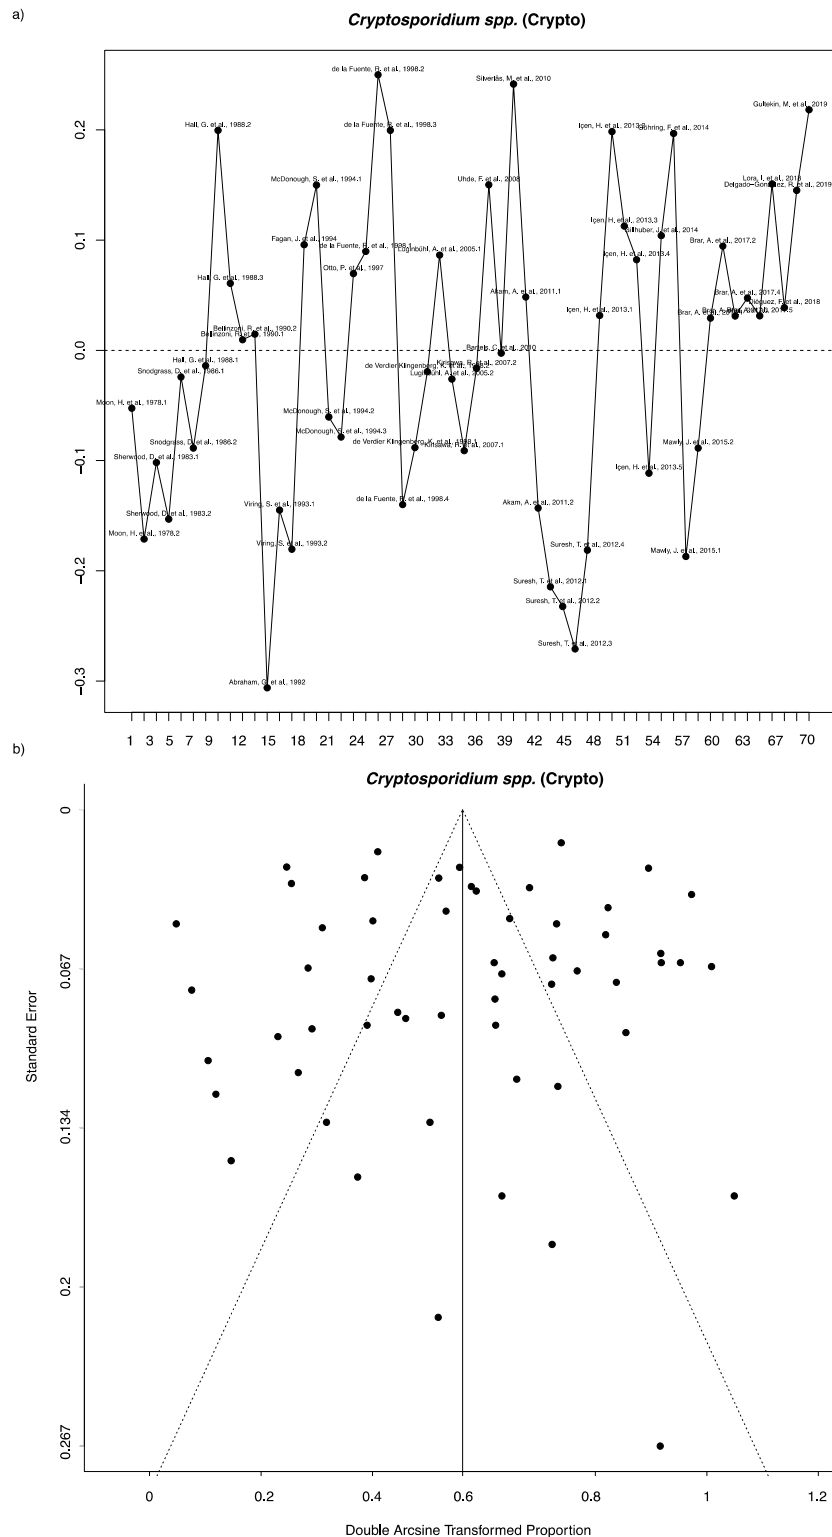

**Figure S7.** Case influence diagnostic analysis (a) and funnel plot (b) of *Cryptosporidium* spp. (Crypto) and bovine rotavirus (BRV) and the identified outliers (shown as red circles). N.B. In case of Crypto-BRV no outliers were identified. The regression test for funnel plot asymmetry in the meta-analysis indicated no publication bias for Crypto-BRV ( $z = -0.25$ ;  $p = 0.79$ ).

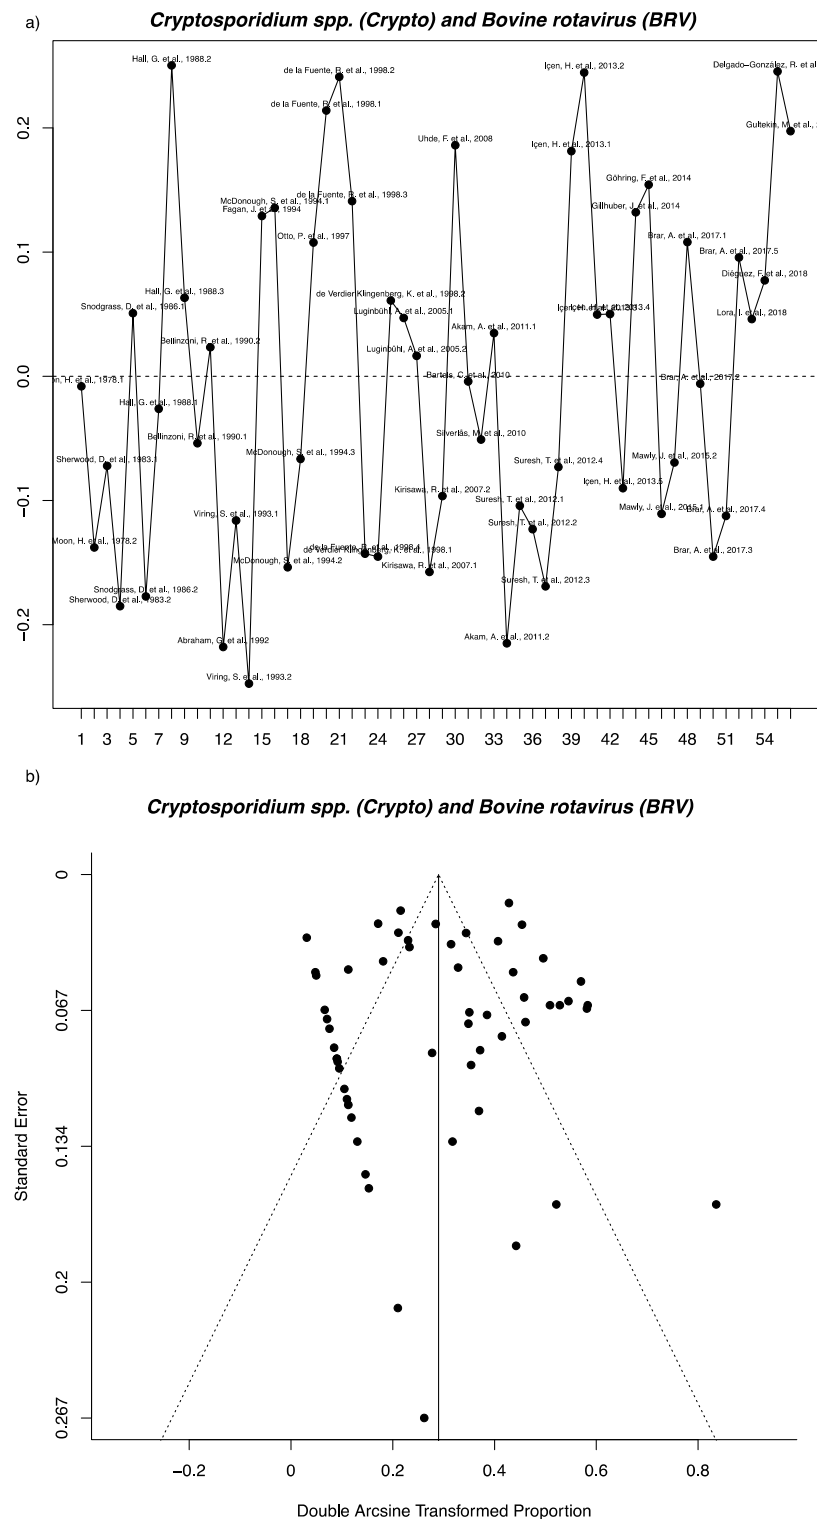



**Figure S8.** Case influence diagnostic analysis (a) and funnel plot (b) of *Cryptosporidium* spp. (Crypto) and bovine coronavirus (BCoV) and the identified outliers (shown as red circles). The regression test for funnel plot asymmetry in the meta-analysis indicated no publication bias for Crypto-BCoV ( $z = 1.89$ ;  $p = 0.05$ ).

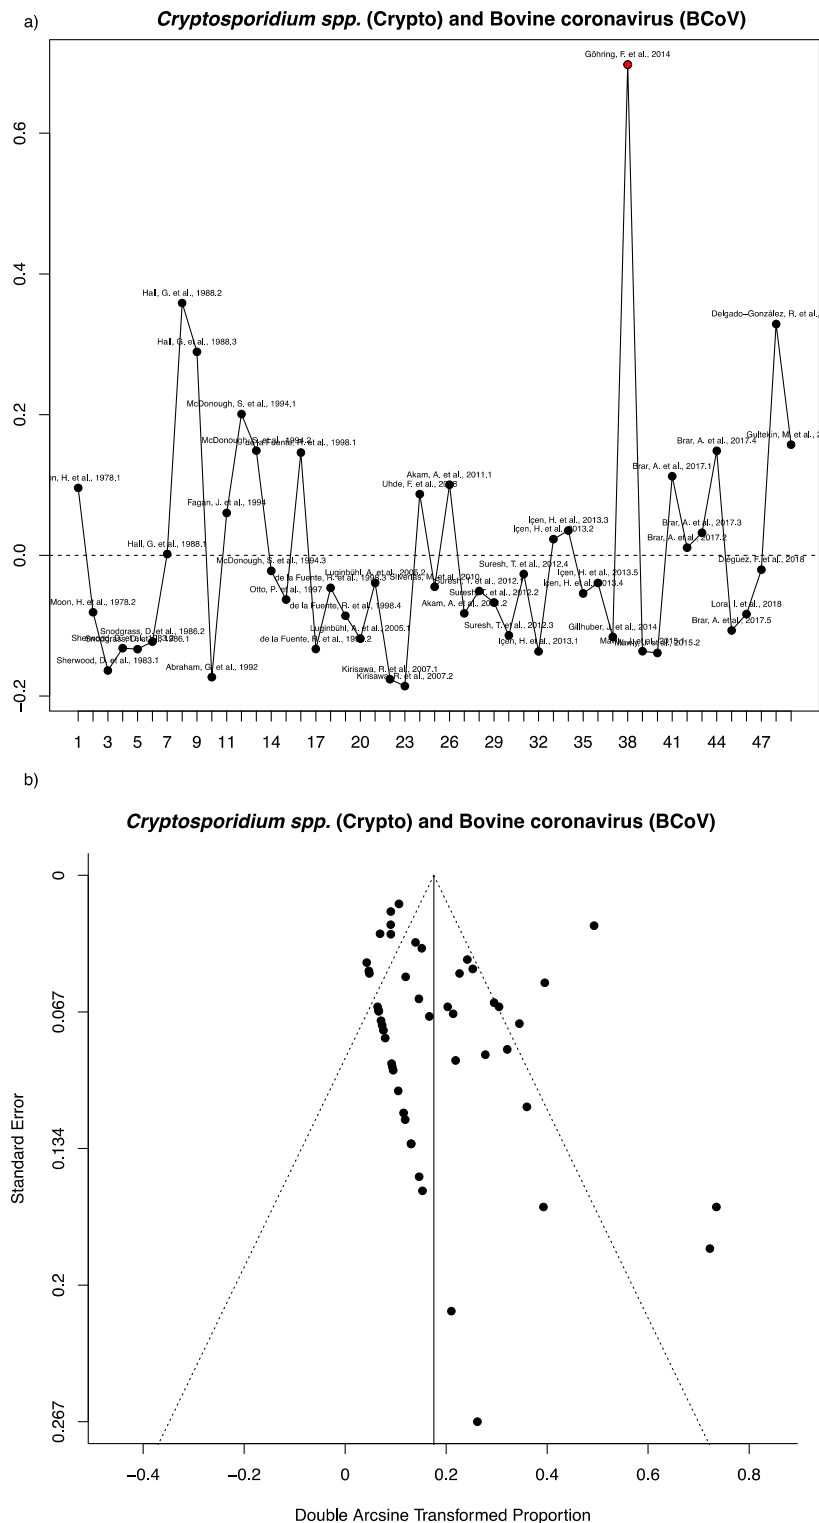

**Figure S9.** Case influence diagnostic analysis (a) and funnel plot (b) of *Cryptosporidium* spp. (Crypto) and *Escherichia coli* F5 (K99) (ETEC) and the identified outliers (shown as red circles). The regression test for funnel plot asymmetry in the meta-analysis indicated a publication bias for Crypto-ETEC ( $z = 2.30$ ;  $p = 0.02$ ).

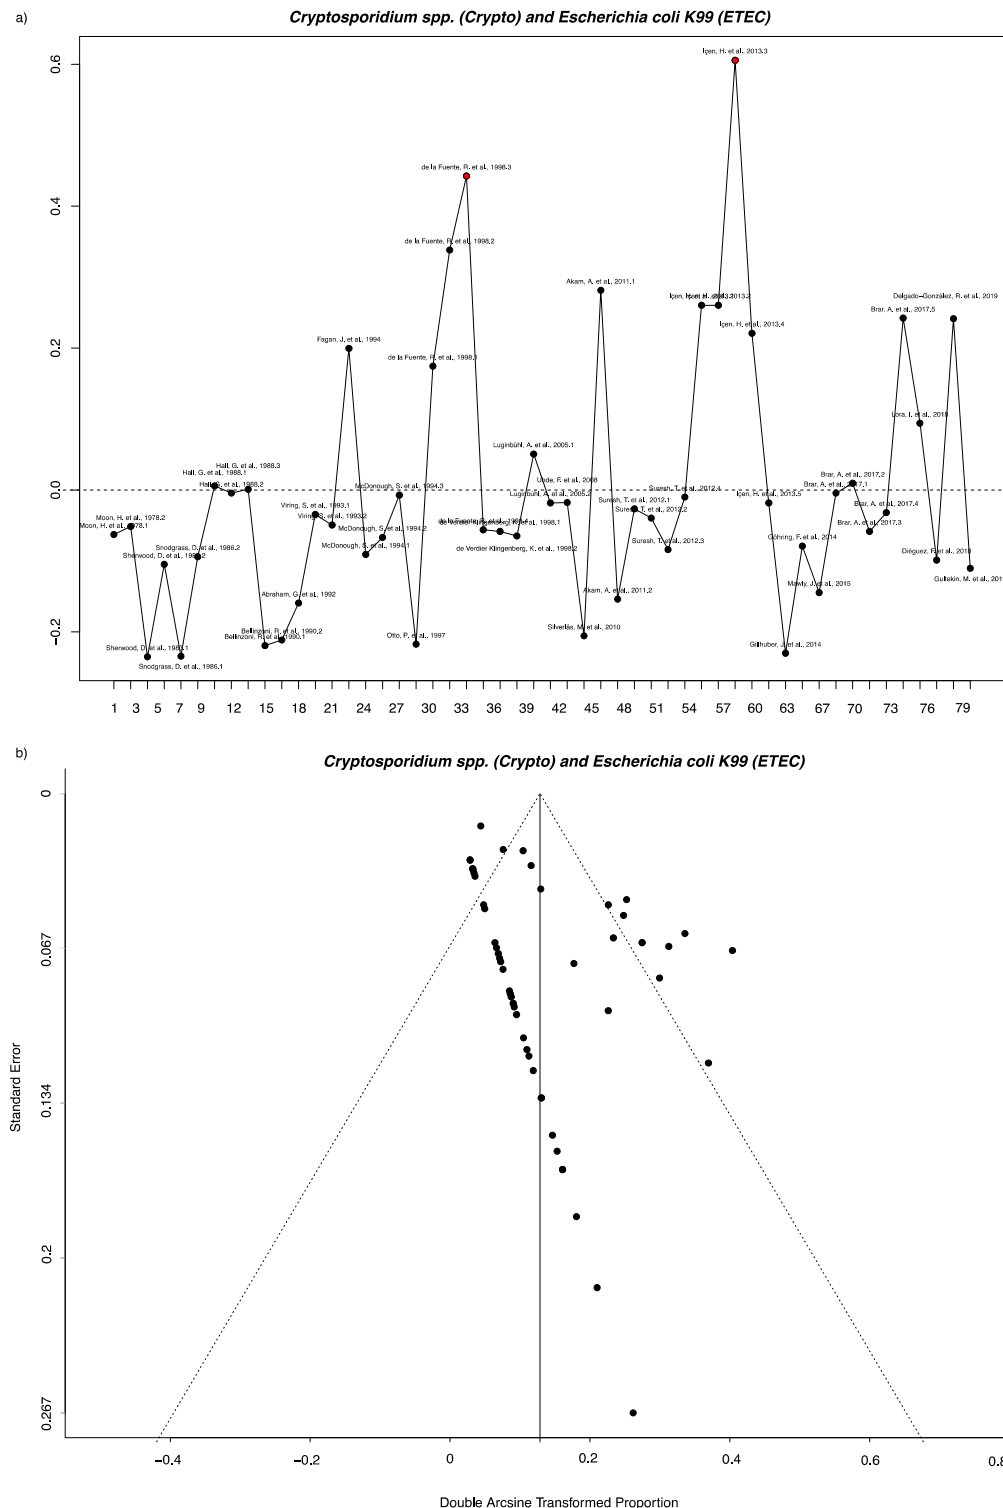

Supplement: s1 [file s1]
